# Supplementary material for: Distinguishing preferences of human APOBEC3A and APOBEC3B for cytosines in hairpin loops, and reflection of these preferences in APOBEC-signature cancer genome mutations
Source: PubMed Central journal article supplement (PMC10948833; doi:10.1038/s41467-024-46231-w), 2024-03-18
Supplement: 41467_2024_46231_MOESM1_ESM.pdf [file 41467_2024_46231_MOESM1_ESM.pdf]

**A**

## Purification of A3B-CTD

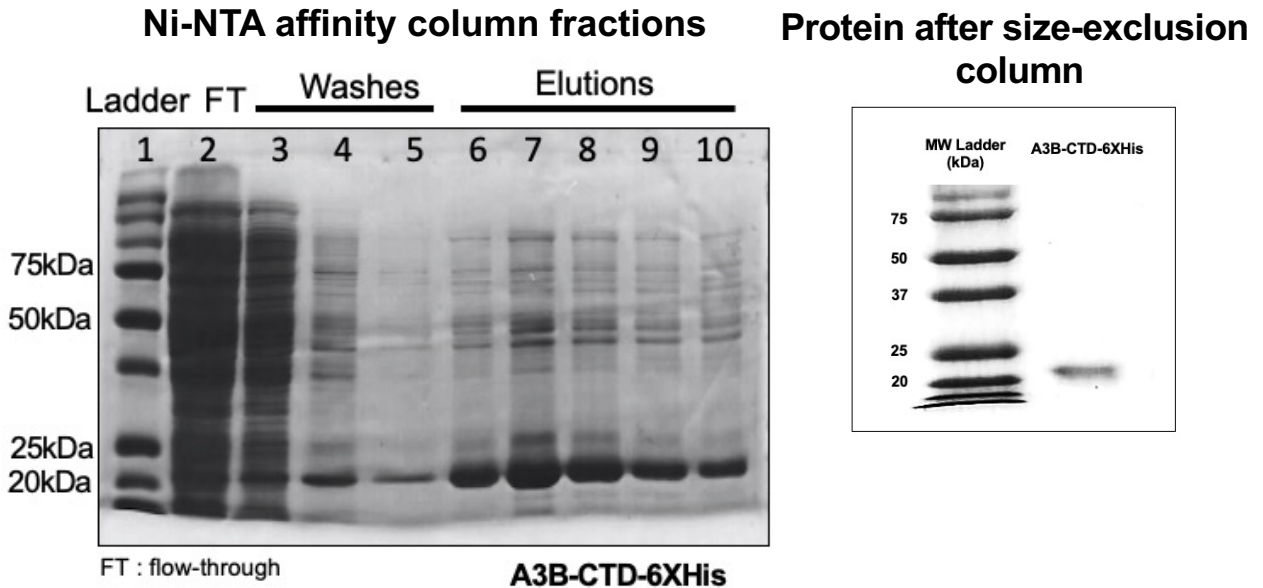**B**

## Purification of A3A

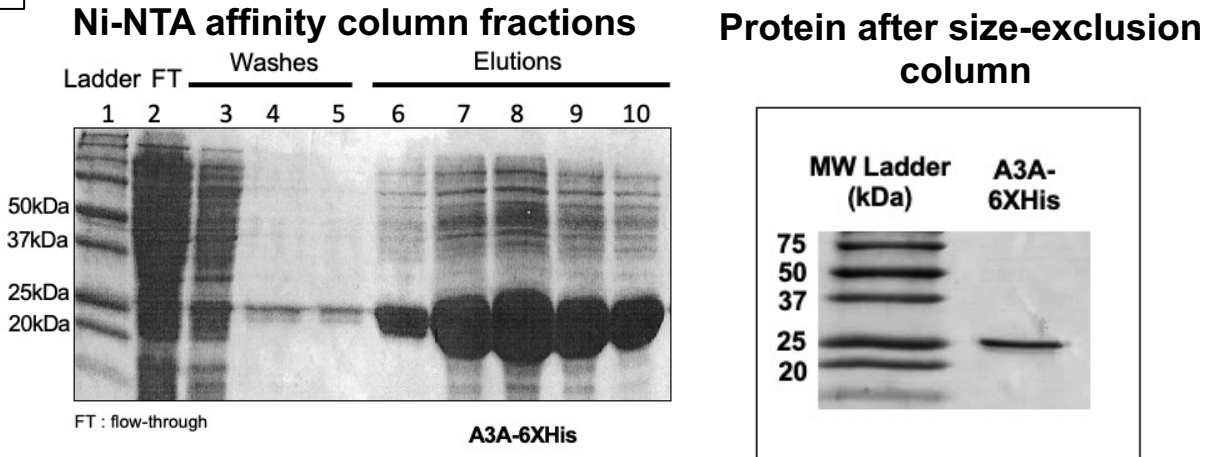

## Supplementary Fig. S1

**Purification of A3A and A3B-CTD proteins.** Poly-His tagged A3A and A3B-CTD proteins were purified to apparent homogeneity using Ni-NTA affinity chromatography followed by separation on a size-exclusion column.

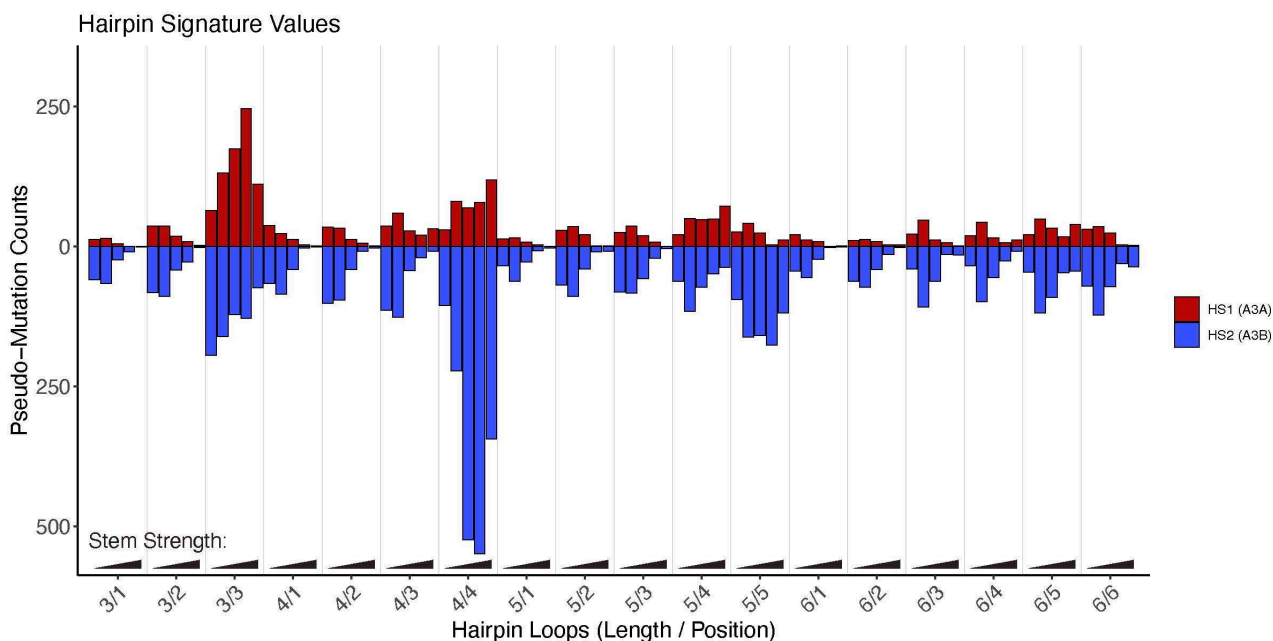

Supplementary Fig. S2

**Hairpin Signature Values for A3A and A3B from UPD-seq.** The sum of pseudo-mutation\* counts in four A3A samples and six A3B-Full samples. These sets of counts help define hairpin signature 1 (HS1; A3A) and hairpin signature 2 (HS2; A3B). Vertical lines separate the values into 18 groups based on hairpin loop length and position. For example, 3/1 has cytosine at 5' end of a trinucleotide loop. Within each group, the values are ordered by increasing stem strength. The bins for stem strengths are: 1-4, 5-7, 8-11, 12-15, and 16+.

\*Pseudo-mutations are positions with uracilation fraction  $\geq 0.03$

A

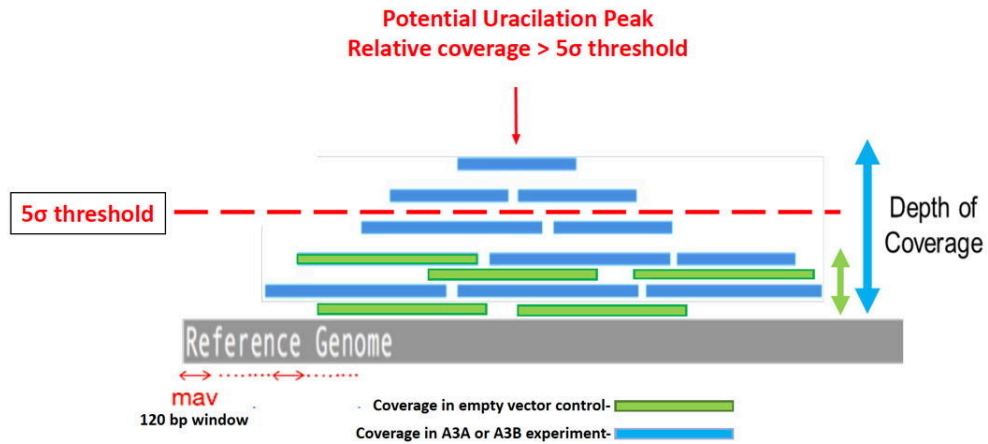

B

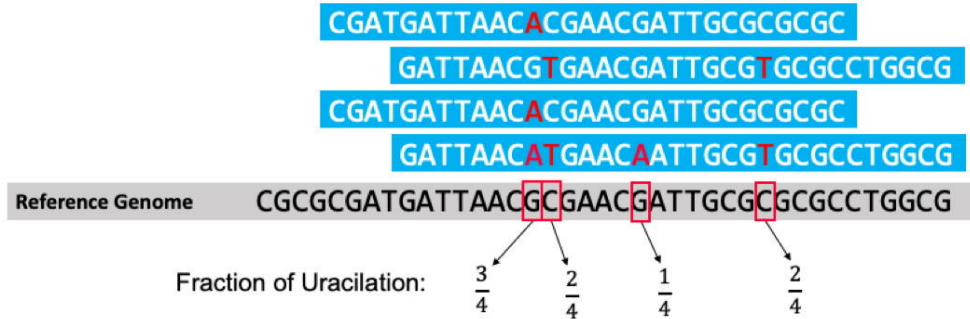

### Supplementary Fig. S3

**Graphical explanation of uracilation peaks and uracilation index. A.** A uracilation peak is detected by comparing the depth of coverage in UPD-seq experiment with that of empty vector control. The NDC2 algorithm calculates the difference in the depth of coverage across the genome using a 120 base pair moving window. “mav” is moving average. A uracilation peak is defined as a region in the genome where relative coverage of the experimental sample is five standard deviations above average. **B.** At any C:G pair in the genome the fraction of sequencing reads that have an T:A pair is calculated. This number, when multiplied with 1,000 gives uracilation index, UI.

# Overlap of Uracilation Peaks with TSS

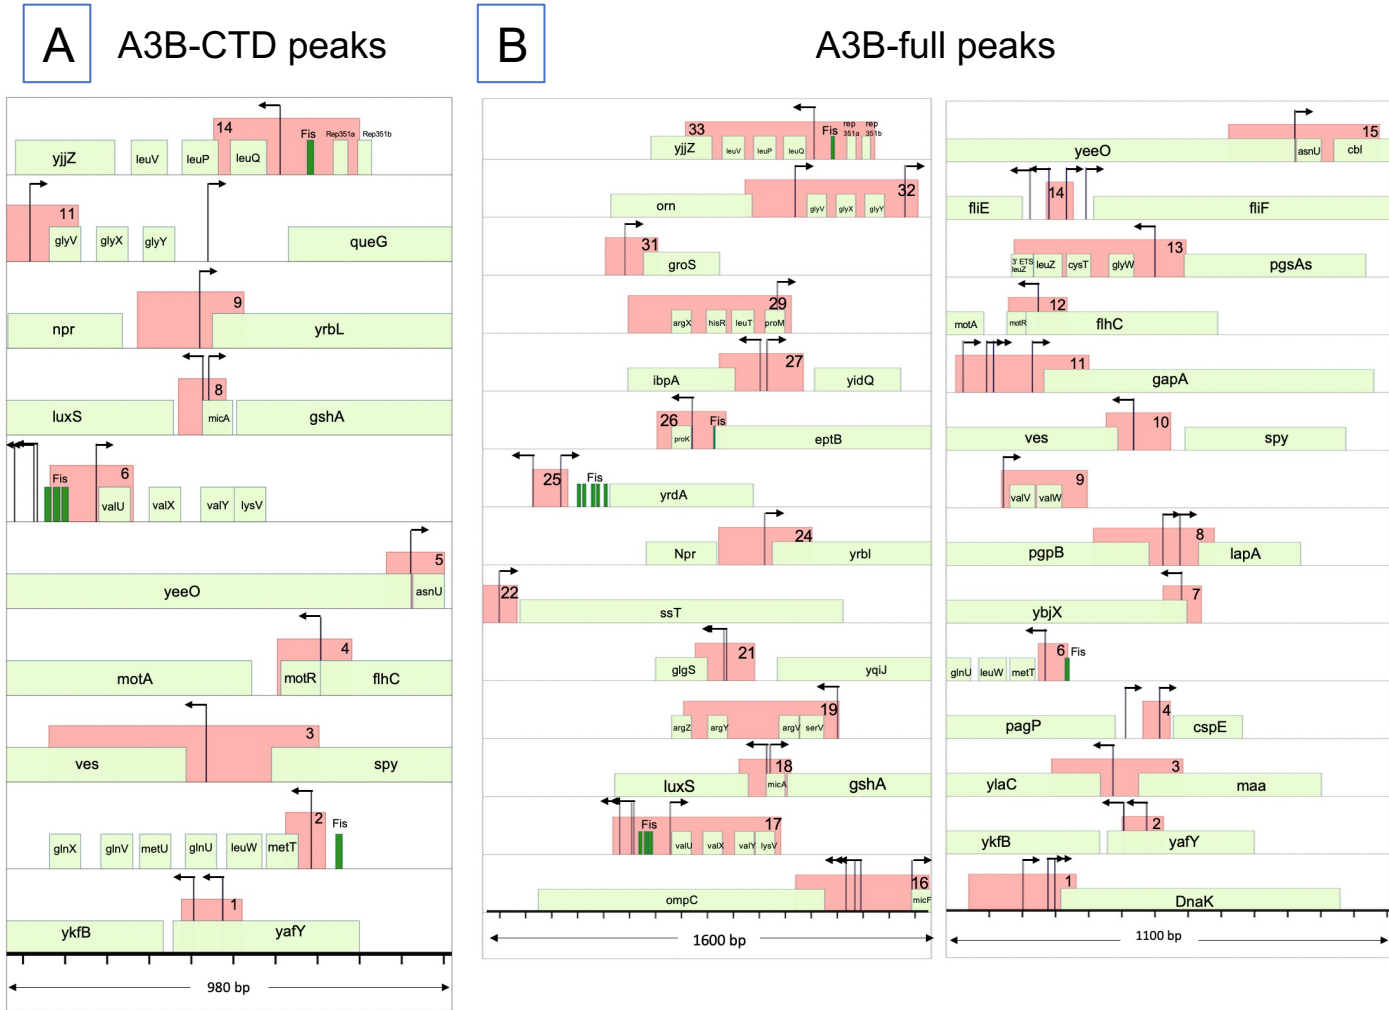

Salmon colored boxes are uracilation peaks created by A3B-CTD and A3B-full and *E. coli* genes with three letter name abbreviations are light green boxes. Experimentally determined transcription start sites (TSS) are vertical lines with left- or right-pointing arrows. The gene positions and TSS are according to EcoCyc database.

Supplementary Figure S4

# Overlap between the Uracilation Peaks

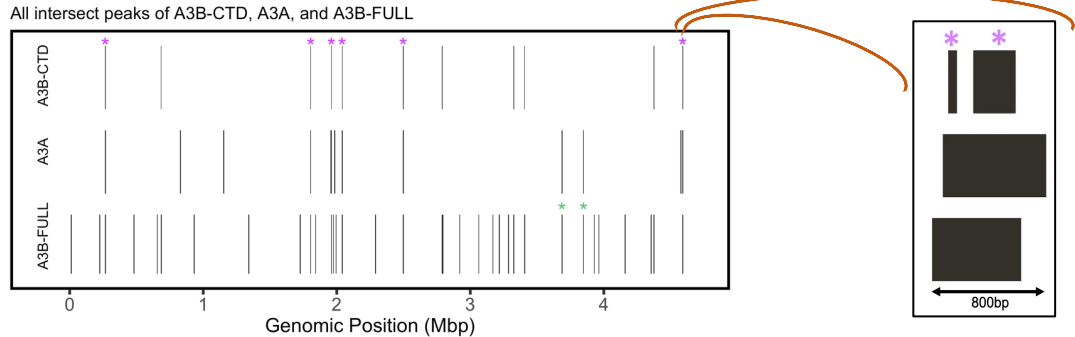

## Supplementary Figure S5

**Details of overlap between an overlapping uracilation peak for A3A, and A3B-CTD and A3B-full.** A3B-full creates a uracilation peak between genome coordinates 4,605,937-4,606,667 that overlaps with a peak created by A3A. A3B-CTD generates two peaks (coordinates – 4,606,069-4,606,140 and 4,606,275-4,606,622) that overlap with the A3A and A3B-full generated peaks (Zoom-in figure on the right).

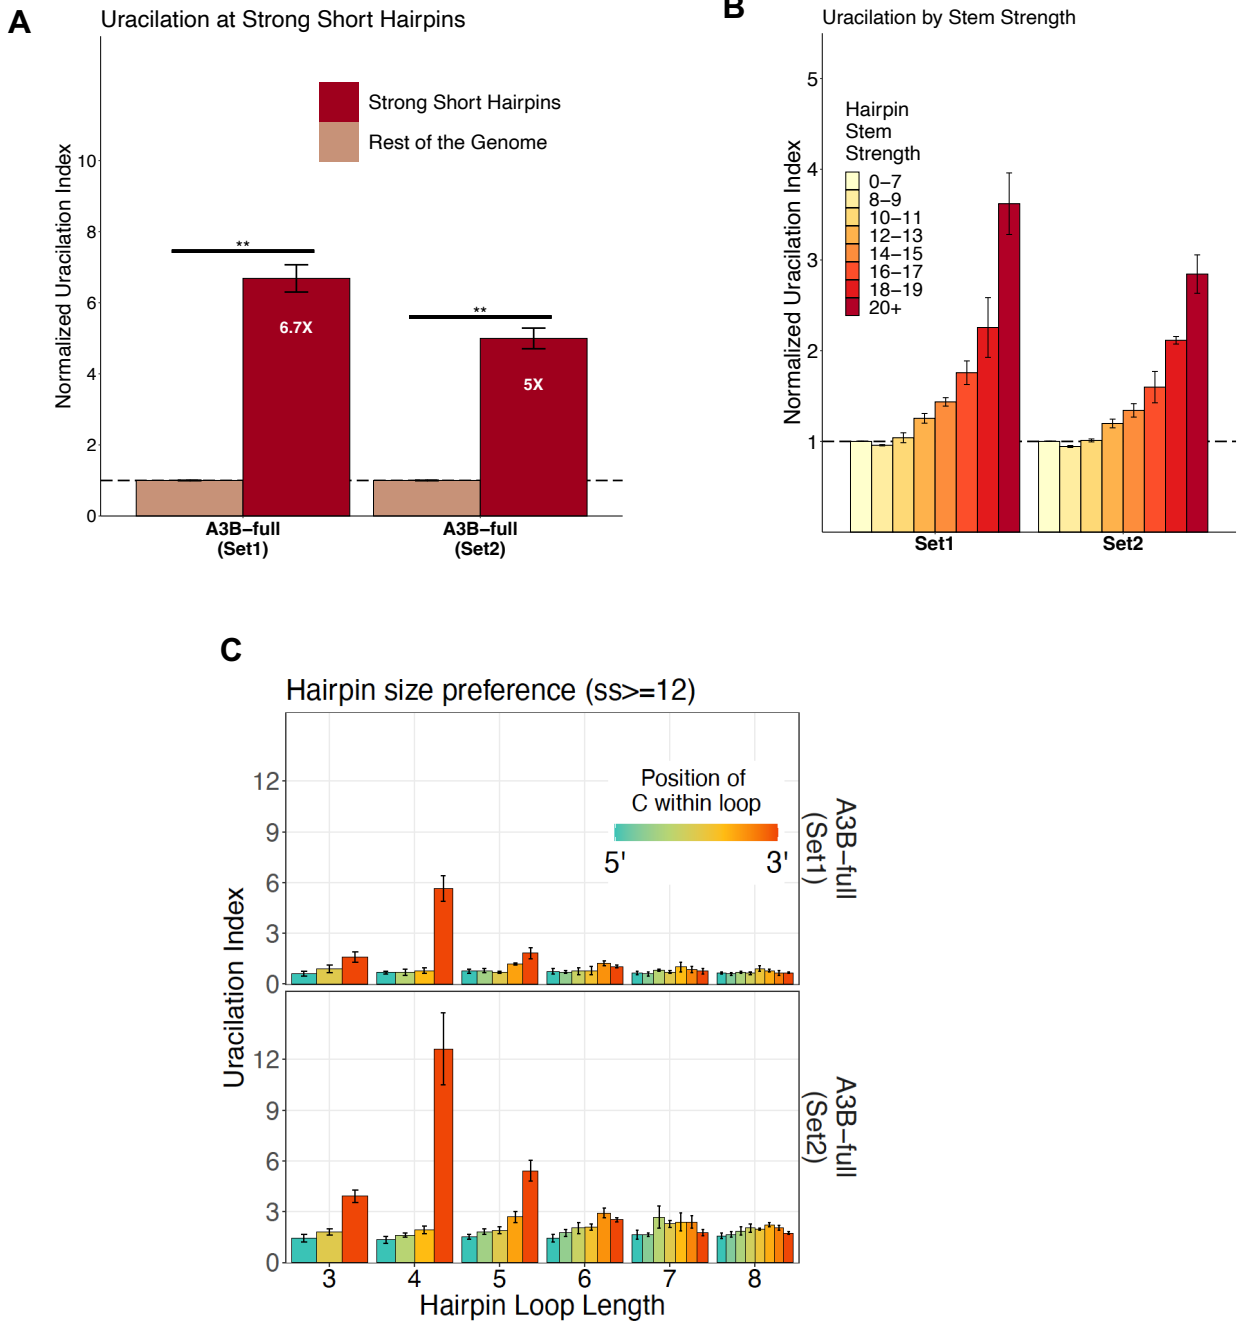

**Supplementary Figure S6**

**Comparison of Two Sets of A3B-full UPD-seq data.** UPD-seq was performed on biological triplicates of BH214 cultures expressing A3B-full at two different times. These are called Set 1 and Set 2. **A.** Preference of A3B-full for hairpin loops. **B.** Dependence of uracilation in hairpin loops on stem-strength. **C.** The preference of A3B-full for cytosines in different loop sizes and positions.

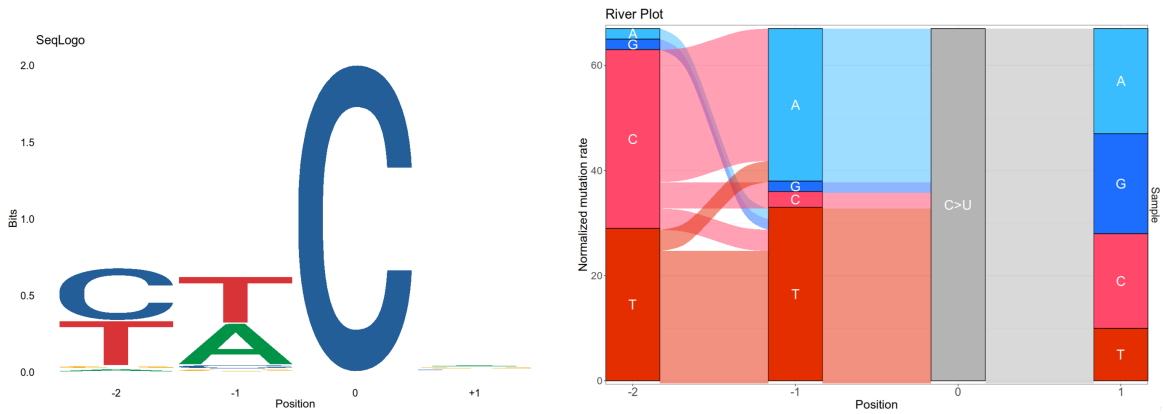

**Supplementary Fig. S7**

**Comparison of SeqLogo and River plots.** While sequence logo plots are useful for showing enrichment of mutations in particular sequence contexts, they lack the ability to convey any relational information with regards to the enriched bases. In our made-up example for a set of deamination events, the Seqlogo plot (Left panel) shows that A and T are enriched at -1 position of a targeted C, while C and T are enriched at the -2 position. Using a River plot to represent the same set of base changes (Right panel), we see that an A at the -1 position is more likely to be preceded by a C. Similarly, a T at the -1 position is more likely to be preceded by another T. When interpreting River plots, one should note the connectivity between different bases and the relative widths of different streams, as these indicate the prevalence of each mutation type and context. An inspection of the River plot, unlike the SeqLogo plot, allows us to conclude that TTC and CAC are preferred targets while TAC and CTC are not.

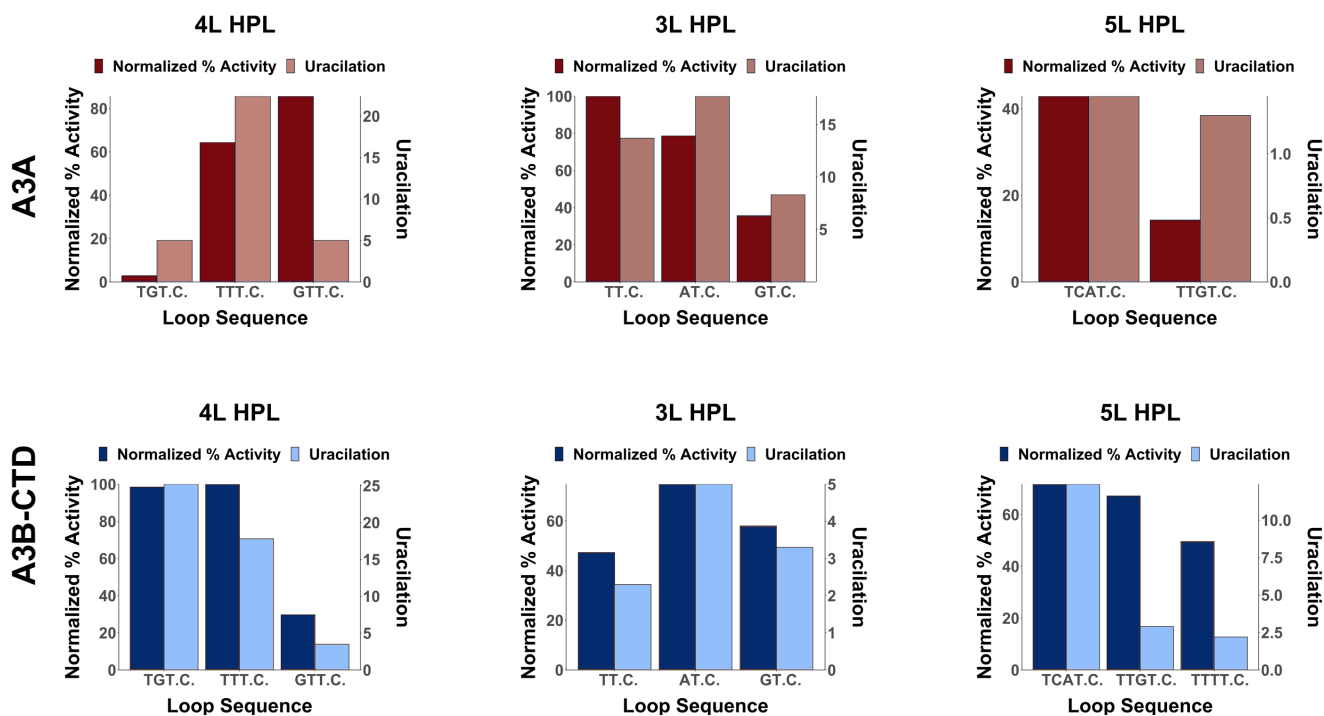

**Supplementary Fig. S8**

**Biochemical activity of A3A and A3B-CTD for different hairpin loops.** A3A and A3B-CTD activity normalized to the activity for the best substrate for each enzyme; TT.C. for A3A and TGT.C. for A3B-CTD



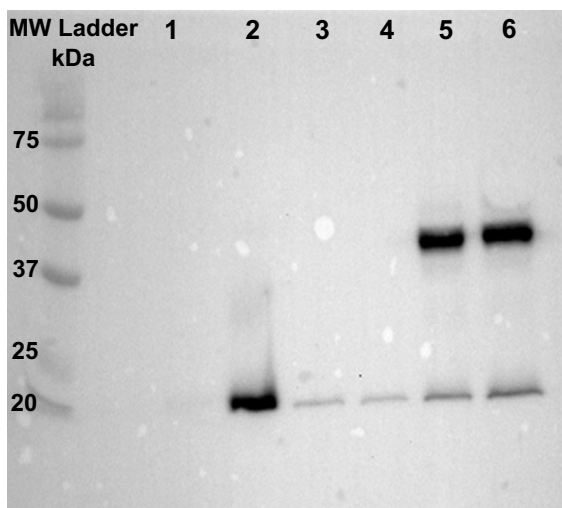

| Lane | Sample                       | AHT concentration (µg/mL) | Quantified A3B or A3B-CTD (nmol) |
|------|------------------------------|---------------------------|----------------------------------|
| 1    | Purified A3B-CTD (50 ng)     | -                         | -                                |
| 2    | Purified A3B-CTD (150 ng)    | -                         | -                                |
| 3    | Cell-free extract (A3B-CTD)  | 0.05                      | 4.8                              |
| 4    | Cell-free extract (A3B-CTD)  | 0.1                       | 3.7                              |
| 5    | Cell-free extract (A3B-Full) | 0.05                      | 17.1                             |
| 6    | Cell-free extract (A3B-Full) | 0.1                       | 24.9                             |

### Supplementary Fig. S9

**Western blot analysis of expression of A3B-CTD and A3B-full in *E. coli*.** Cell-free extracts and purified A3B-CTD were separated on an SDS-PAGE gel, transferred to a nylon membrane and interrogated using a rabbit anti-A3B monoclonal antibody (1:2000 dilution, NIH AIDS Reagent Program, catalog number 5210-87-13). The concentration of inducer, anhydrotetracycline (AHT) used, if any, and the source of protein loaded in each lane is noted in the Table on the right. The signal in lane 2 was used to calculate the amount of protein in lanes 3 through 6.

## Supplementary Table S1 A3B-CTD

| Sr. no | Uracilation peak*<br>Start | Uracilation peak*<br>End | Gene type  | Gene    | Targeted by A3B-<br>full as well? | TSS                |
|--------|----------------------------|--------------------------|------------|---------|-----------------------------------|--------------------|
| 1      | 266130                     | 266274                   | CDS        | yafY    | yes                               | 266158<br>266227   |
| 2      | 697103                     | 697198                   | tRNA       | metT    | yes                               | 697163             |
| 3      | 1824611                    | 1825253                  | CDS        | ves     | yes                               | 1824984            |
|        |                            |                          | CDS        | spy     | yes                               |                    |
| 4      | 1977200                    | 1977377                  | CDS        | motR    | yes                               | 1977302            |
|        |                            |                          | CDS        | flhC    | yes                               |                    |
| 5      | 2059788                    | 2059900                  | CDS        | yeeO    | yes                               | 2059845            |
|        |                            |                          | tRNA       | asnU    | yes                               |                    |
| 6      | 2520815                    | 2521013                  | tRNA       | valU    | yes                               | 2520924            |
|        |                            |                          |            |         |                                   |                    |
| 7      | 2521221                    | 2521276                  | tRNA       | valY    | yes                               | no                 |
|        |                            |                          | tRNA       | lysV    | yes                               |                    |
| 8      | 2814745                    | 2814858                  | CDS        | micA    | yes                               | 2814802<br>2814816 |
| 9      | 3348274                    | 3348527                  | CDS        | yrbl    | yes                               | 3348421            |
| 10     | 3428663                    | 3428787                  | rRNA       | rRNA    | no                                | no                 |
| 11     | 4392203                    | 4392429                  | tRNA       | glyV    | yes                               | 4392313            |
| 12     | 4392619                    | 4392701                  | tRNA       | glyY    | yes                               | no                 |
| 13     | 4606069                    | 4606140                  | tRNA       | leuV    | yes                               | no                 |
| 14     | 4606275                    | 4606622                  | tRNA       | leuP    | yes                               | 4606432            |
|        |                            |                          | tRNA       | leuQ    | yes                               |                    |
|        |                            |                          | extragenic | rep351a | yes                               |                    |
|        |                            |                          | extragenic | rep351b | yes                               |                    |

\*Uracilation peaks in the strain BH214 were detected using Normalized Differential Coverage (NDC) 2 software. The corresponding sequences in MG1655 were identified using the homology search engine within the EcoCyc Database and were annotated based on the information in EcoCyc {Keseler, 2021 #341}. CDS are protein coding genes. tRNA genes are shown in red.

# Supplementary Table S1

## A3B-full

| Sr. no | Uracilation peak* Start | Uracilation peak* End | Gene type  | Gene        | Targeted by A3B-CTD as well? | TSS     |
|--------|-------------------------|-----------------------|------------|-------------|------------------------------|---------|
| 1      | 11887                   | 12209                 | CDS        | dnaK        | no                           | 12048   |
|        |                         |                       |            |             |                              | 12123   |
|        |                         |                       |            |             |                              | 12144   |
| 2      | 266154                  | 266279                | CDS        | yafY        | yes                          | 266158  |
|        |                         |                       |            |             |                              | 266227  |
| 3      | 479104                  | 479500                | CDS        | ylaC        | no                           | 479288  |
|        |                         |                       | CDS        | maa         | no                           |         |
| 4      | 657200                  | 657283                | intergenic | metT        | no                           | 657250  |
| 5      | 696594                  | 696789                | tRNA       | glnV        | no                           | no      |
|        |                         |                       | tRNA       | metU        |                              |         |
|        |                         |                       | tRNA       | glnW        |                              |         |
| 6      | 697143                  | 697232                | intergenic |             | yes                          | 697163  |
| 7      | 919048                  | 919164                | CDS        | ybjX        | no                           | 919103  |
| 8      | 1339926                 | 1340291               | CDS        | pgpB        | no                           | 1340135 |
|        |                         |                       | CDS        | lapA        | no                           | 1340186 |
| 9      | 1746410                 | 1746669               | tRNA       | valV        | no                           | 1746415 |
|        |                         |                       | tRNA       | valW        |                              |         |
| 10     | 1824902                 | 1825097               | CDS        | ves         | yes                          | 1824984 |
| 11     | 1862505                 | 1862907               | CDS        | gapA        | no                           | 1862526 |
|        |                         |                       |            |             |                              | 1862597 |
|        |                         |                       |            |             |                              | 1862618 |
|        |                         |                       |            |             |                              | 1862735 |
| 12     | 1977213                 | 1977390               | srna       | motR        | yes                          | 1977302 |
|        |                         |                       | CDS        | flhC        | yes                          |         |
| 13     | 1991756                 | 1992275               | srna       | 3' ETS leuZ | no                           | 1992180 |
|        |                         |                       | tRNA       | leuZ        |                              |         |
|        |                         |                       | tRNA       | cysT        |                              |         |
|        |                         |                       | tRNA       | glyW        |                              |         |
|        |                         |                       | CDS        | pgsA        |                              |         |
| 14     | 2013086                 | 2013168               | intergenic |             | no                           | 2013093 |
|        |                         |                       |            |             |                              | 2013146 |
| 15     | 2059646                 | 2060101               | tRNA       | yeeO        | yes                          | 2059845 |
|        |                         |                       | tRNA       | asnU        | yes                          |         |
|        |                         |                       | CDS        | cbl         | no                           |         |
| 16     | 2312637                 | 2313152               | CDS        | ompC        | no                           | 2312864 |
|        |                         |                       | CDS        | micF        | no                           | 2312887 |
|        |                         |                       |            |             |                              | 2312830 |
|        |                         |                       |            |             |                              | 2313084 |
| 17     | 2520704                 | 2521351               | tRNA       | valU        | yes                          | 2520730 |

|    |         |            |            |         |     |         |
|----|---------|------------|------------|---------|-----|---------|
|    |         |            | tRNA       | valX    | no  | 2520776 |
|    |         |            | tRNA       | valY    | yes | 2520784 |
|    |         |            | tRNA       | lysV    |     | 2520924 |
| 18 | 2814697 | 2814897    | CDS        | luxS    | no  | 2814802 |
|    |         |            | CDS        | micA    | yes | 2814816 |
|    |         |            | CDS        | gshA    | no  |         |
| 19 | 2818105 | 2818704    | tRNA       | argZ    | no  | 2818697 |
|    |         |            | tRNA       | argY    |     |         |
|    |         |            | tRNA       | argV    |     |         |
|    |         |            | tRNA       | serV    |     |         |
| 20 | 3086265 | 3086520    | CDS        | yqgC    | no  | no      |
|    |         |            | CDS        | yqgD    |     |         |
| 21 | 3191892 | 3192121    | CDS        | glgS    | no  | 3192002 |
|    |         |            |            |         |     | 3192012 |
| 22 | 3239796 | intergenic |            |         | no  | 3239863 |
| 23 | 3308447 | 3308550    | CDS        | nlpl    | no  | no      |
| 24 | 3348245 | 3348605    | CDS        | yrbL    | yes | 3348421 |
| 25 | 3428939 | 3429076    | intergenic |         | no  | 3428940 |
|    |         |            |            |         |     | 3429047 |
| 26 | 3708560 | 3708826    | tRNA       | proK    | no  | 3708694 |
|    |         |            | CDS        | eptB    | no  |         |
| 27 | 3867361 | 3867685    | CDS        | ibpA    | no  | 3867518 |
|    |         |            |            |         |     | 3867544 |
| 28 | 3946944 | 3947047    | tRNA       | aspT    | no  | no      |
|    |         |            | tRNA       | trpT    |     |         |
| 29 | 3982425 | 3982836    | tRNA       | argX    | no  | 3982781 |
|    |         |            | tRNA       | hisR    |     |         |
|    |         |            | tRNA       | leuT    |     |         |
|    |         |            | tRNA       | proM    |     |         |
| 30 | 4175423 | 4175956    | tRNA       | thrU    | no  | no      |
|    |         |            | tRNA       | tyrU    |     |         |
|    |         |            | tRNA       | glyT    |     |         |
|    |         |            | tRNA       | thrT    |     |         |
|    |         |            | CDS        | tufB    |     |         |
| 31 | 4370541 | 4370743    | CDS        | groS    | no  | 4370616 |
| 32 | 4392121 | 4392788    | CDS        | orn     | no  | 4392313 |
|    |         |            | tRNA       | glyV    | yes | 4392736 |
|    |         |            | tRNA       | glyX    | no  |         |
|    |         |            | tRNA       | glyY    | yes |         |
| 33 | 4605937 | 4606667    | CDS        | yjzZ    | no  | 4606432 |
|    |         |            | tRNA       | leuV    | yes |         |
|    |         |            | tRNA       | leuP    |     |         |
|    |         |            | tRNA       | leuQ    |     |         |
|    |         |            | extragenic | rep351a |     |         |
|    |         |            | extragenic | rep351b |     |         |

\*Uracilation peaks in the strain BH214 were detected using Normalized Differential Coverage (NDC2) software. The corresponding sequences in MG1655 were identified using the homology search engine within the EcoCyc Database and were annotated based on the information in EcoCyc {Keseler, 2021 #341}. CDS are protein coding genes. tRNA genes are shown in red.

**Supplementary Table S2**  
**Correlation between hairpin loops preferred by A3A, A3B-CTD and A3B-full**

|            | A3A_1     | A3A_2     | A3A_3     | A3A_4     | A3B_CTD_1 | A3B_CTD_2 | A3B_CTD_3 | A3B_full_1 | A3B_full_2 | A3B_full_3 | A3B_full_4 | A3B_full_5 | A3B_full_6 |
|------------|-----------|-----------|-----------|-----------|-----------|-----------|-----------|------------|------------|------------|------------|------------|------------|
| A3A_1      | 1         | 0.5953623 | 0.7082655 | 0.6716858 | 0.3137248 | 0.352919  | 0.3514978 | 0.3758714  | 0.3720424  | 0.4058631  | 0.3286559  | 0.2515169  | 0.2824636  |
| A3A_2      | 0.5953623 | 1         | 0.6530038 | 0.6346622 | 0.3137123 | 0.3768321 | 0.3530299 | 0.3956832  | 0.3852548  | 0.4258857  | 0.3401083  | 0.2551982  | 0.2664238  |
| A3A_3      | 0.7082655 | 0.6530038 | 1         | 0.8205131 | 0.4201809 | 0.4589042 | 0.4324308 | 0.4404088  | 0.4493596  | 0.4515312  | 0.429623   | 0.3190364  | 0.3624017  |
| A3A_4      | 0.6716858 | 0.6346622 | 0.8205131 | 1         | 0.3950985 | 0.4525015 | 0.4025707 | 0.4056686  | 0.3987843  | 0.4077256  | 0.4154228  | 0.3112035  | 0.3427507  |
| A3B_CTD_1  | 0.3137248 | 0.3137123 | 0.4201809 | 0.3950985 | 1         | 0.7960863 | 0.7845507 | 0.7695222  | 0.7872811  | 0.777655   | 0.7200013  | 0.6556866  | 0.626292   |
| A3B_CTD_2  | 0.352919  | 0.3768321 | 0.4589042 | 0.4525015 | 0.7960863 | 1         | 0.8076474 | 0.8035099  | 0.8186589  | 0.818538   | 0.7572724  | 0.690803   | 0.632426   |
| A3B_CTD_3  | 0.3514978 | 0.3530299 | 0.4324308 | 0.4025707 | 0.7845507 | 0.8076474 | 1         | 0.7921193  | 0.8117791  | 0.8093987  | 0.7384234  | 0.6580035  | 0.6523893  |
| A3B_full_1 | 0.3758714 | 0.3956832 | 0.4404088 | 0.4056686 | 0.7695222 | 0.8035099 | 0.7921193 | 1          | 0.8741952  | 0.8616117  | 0.741043   | 0.6560404  | 0.6103436  |
| A3B_full_2 | 0.3720424 | 0.3852548 | 0.4493596 | 0.3987843 | 0.7872811 | 0.8186589 | 0.8117791 | 0.8741952  | 1          | 0.8800569  | 0.7516146  | 0.6897404  | 0.6129017  |
| A3B_full_3 | 0.4058631 | 0.4258857 | 0.4515312 | 0.4077256 | 0.777655  | 0.818538  | 0.8093987 | 0.8616117  | 0.8800569  | 1          | 0.7420341  | 0.6692421  | 0.6137751  |
| A3B_full_4 | 0.3286559 | 0.3401083 | 0.429623  | 0.4154228 | 0.7200013 | 0.7572724 | 0.7384234 | 0.741043   | 0.7516146  | 0.7420341  | 1          | 0.6445453  | 0.5945571  |
| A3B_full_5 | 0.2515169 | 0.2551982 | 0.3190364 | 0.3112035 | 0.6556866 | 0.690803  | 0.6580035 | 0.6560404  | 0.6897404  | 0.6692421  | 0.6445453  | 1          | 0.5371814  |
| A3B_full_6 | 0.2824636 | 0.2664238 | 0.3624017 | 0.3427507 | 0.626292  | 0.632426  | 0.6523893 | 0.6103436  | 0.6129017  | 0.6137751  | 0.5945571  | 0.5371814  | 1          |

|                                                 | min       | mean      | max       |
|-------------------------------------------------|-----------|-----------|-----------|
| Correlation values among A3A samples            | 0.5953623 | 0.6805821 | 0.8205131 |
| Correlation values among A3B-CTD samples        | 0.7845507 | 0.7960948 | 0.8076474 |
| Correlation values among A3B-full samples       | 0.5371814 | 0.6985922 | 0.8800569 |
| Correlation values between A3A and A3B* samples | 0.2515169 | 0.3733968 | 0.4589042 |

| <b>Table S3</b>                                             |               |                                               |
|-------------------------------------------------------------|---------------|-----------------------------------------------|
| <b>The sequences of oligonucleotides used in this study</b> |               |                                               |
|                                                             | <b>Name</b>   | <b>Sequence</b>                               |
| 1                                                           | Linear GTT.C. | 5' - (6-FAM) -GCAAGCT <b>GTT</b> CAAAAAAATGA  |
| 2                                                           | TT.C.         | 5' - (6-FAM) -GCAAGCT <b>TTC</b> AGCTTGCTGA   |
| 3                                                           | GTT.C.        | 5' - (6-FAM) -GCAAGCT <b>GTT</b> CAGCTTGCTGA  |
| 4                                                           | AGTT.C.       | 5' - (6-FAM) -GCAAGCT <b>AGTT</b> CAGCTTGCTGA |
| 5                                                           | TTT.C.        | 5' - (6-FAM) -GCAAGCT <b>TTT</b> CAGCTTGCTGA  |
| 6                                                           | 10 nt oligo   | 5' -AGCTTGCTGA- (6-FAM) -3'                   |
| 7                                                           | AT.C.         | 5' - (6-FAM) -GCAAGCT <b>ATC</b> AGCTTGCTGA   |
| 8                                                           | GT.C.         | 5' - (6-FAM) -GCAAGCT <b>GTC</b> AGCTTGCTGA   |
| 9                                                           | TGT.C.        | 5' - (6-FAM) -GCAAGCT <b>TGTC</b> AGCTTGCTGA  |
| 10                                                          | TCAT.C.       | 5' - (6-FAM) -GCAAGCT <b>TCAT</b> CAGCTTGCTGA |
| 11                                                          | TTGT.C.       | 5' - (6-FAM) -GCAAGCT <b>TTGT</b> CAGCTTGCTGA |
| 12                                                          | TTTT.C.       | 5' - (6-FAM) -GCAAGCT <b>TTTT</b> CAGCTTGCTGA |

The stem sequence of hairpins is from NUP93<sup>38</sup>
